# Supplementary material for: Genetic rescue remains underused for aiding recovery of federally listed vertebrates in the United States
Source: PubMed Central journal article supplement (PMC10287150; doi:10.1093/jhered/esad002), 2023-03-28

**Supplemental Material for:**

**Genetic rescue remains underused for aiding recovery of federally listed vertebrates in the United States**

Sarah W. Fitzpatrick<sup>1,2,3</sup>, Cinnamon Mittan-Moreau<sup>1,3</sup>, Madison Miller<sup>4</sup>, Jessica M. Judson<sup>1</sup>

<sup>1</sup> W.K. Kellogg Biological Station, Michigan State University, Hickory Corners, MI, USA

<sup>2</sup> Department of Integrative Biology, Michigan State University, East Lansing, MI, USA

<sup>3</sup> Ecology, Evolution, and Behavior Program, Michigan State University, East Lansing, MI, USA

<sup>4</sup> Savannah River Ecology Lab, University of Georgia, Aiken, SC, USA

**Table S1: Guidelines for determining species' recovery potential** Adapted from Federal Register Document 83-25716, 1983.

|                                                   | <b>High Recovery Potential</b>                                                               | <b>Low Recovery Potential</b>                                                                           |
|---------------------------------------------------|----------------------------------------------------------------------------------------------|---------------------------------------------------------------------------------------------------------|
| <b>Biological and Ecological limiting factors</b> | Well understood                                                                              | Poorly understood                                                                                       |
| <b>Threats to species existence</b>               | Well understood and easily managed                                                           | Poorly understood or pervasive and difficult to alleviate                                               |
| <b>Management needed</b>                          | Intensive management not needed, or techniques well documented with high priority of success | Intensive management with uncertain probability of success, or techniques unknown or still experimental |

**Figure S1. Relationship between time to maturity and Genetic Rescue Suitability Index (GR Index).** Age at maturity was split into two categories: species that mature in less than 4 years are included in the “Fast” category, and those that mature in 4 or more years are included in the “Slow” category.

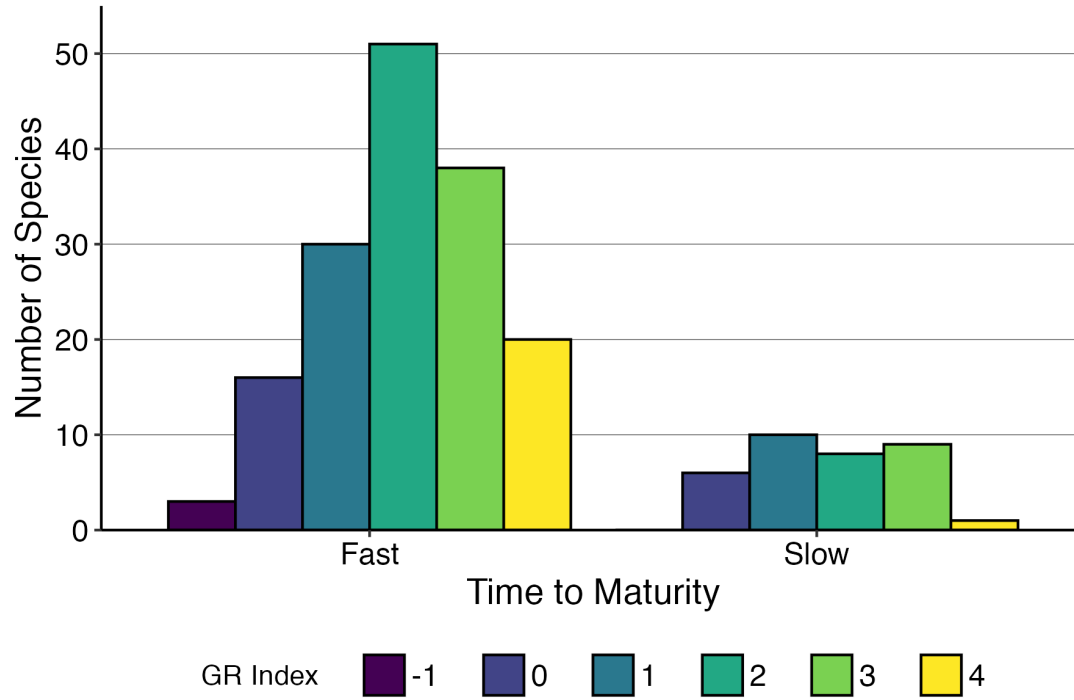

**Figure S2. Percent of scores given for each question used in assigning a genetic rescue suitability index.** Abbreviations for each question are on the x-axis.

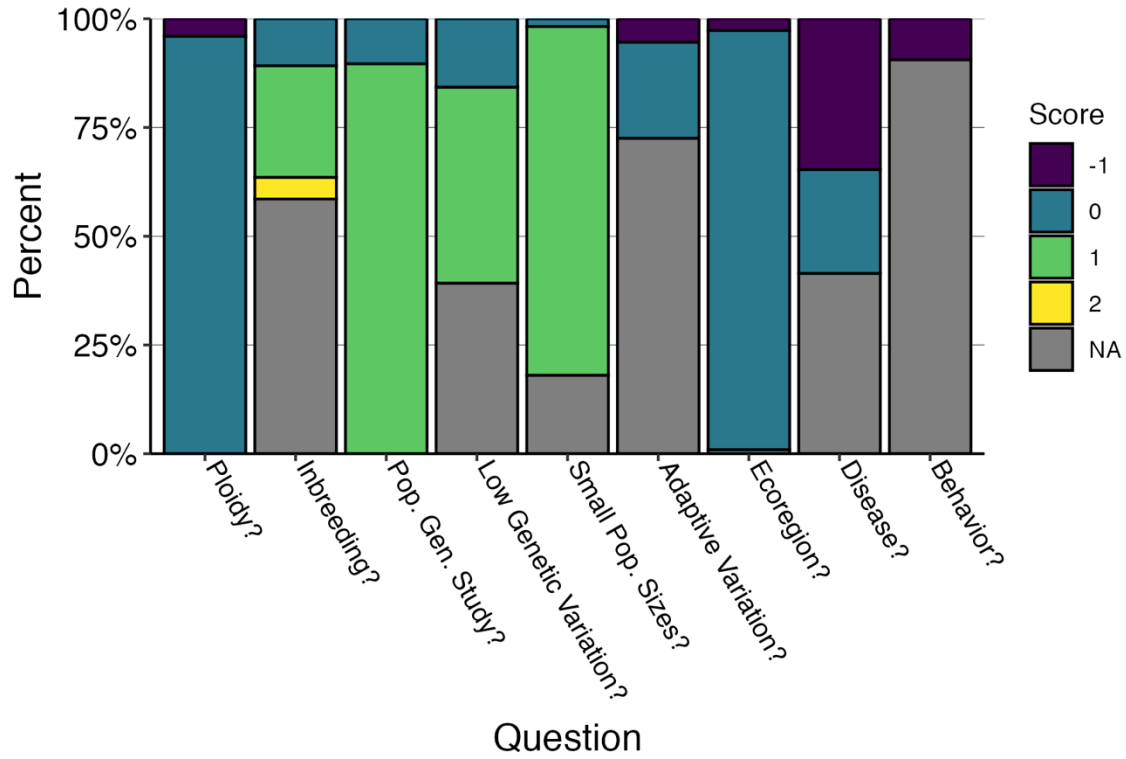

**Figure S3. Proportion of species within each translocation status split by the number of populations remaining.** The remaining number of populations for each species was derived from NatureServe Explorer’s “Estimated Number of Element Occurrences”.

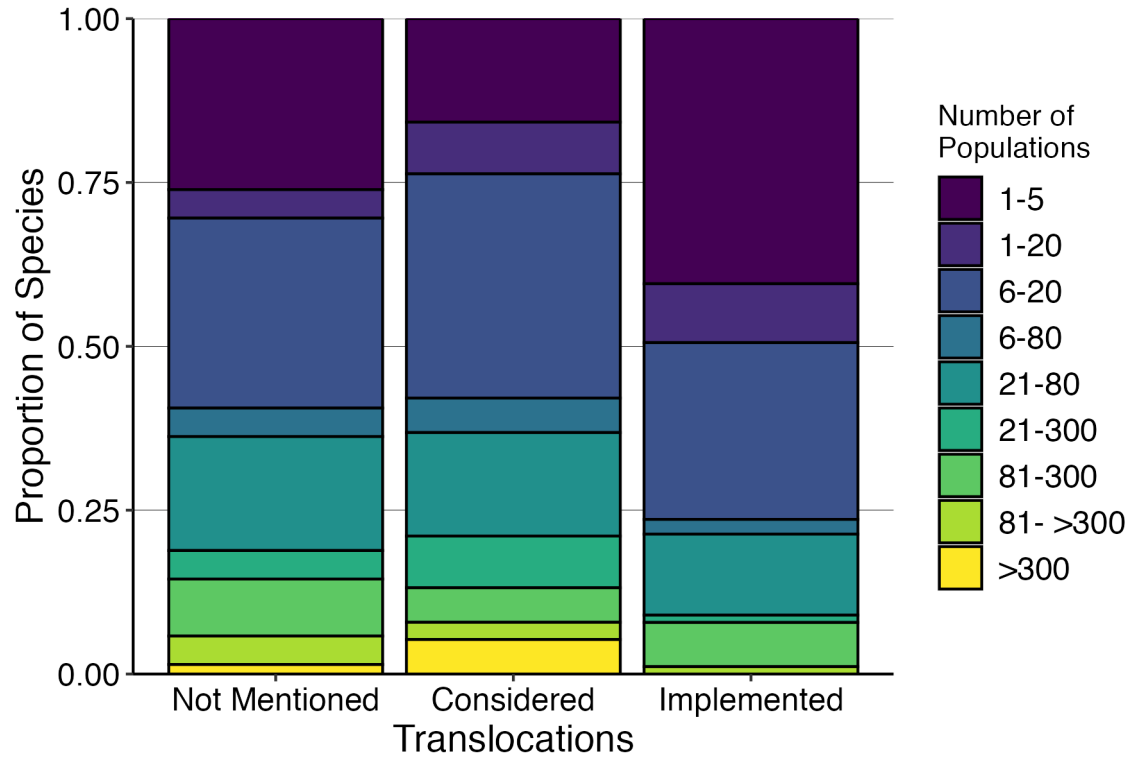

Supplement: esad002_suppl_supplementary_material.pdf [file esad002_suppl_supplementary_material.pdf]
